# Supplementary figures and images for: Accumbens cholinergic interneurons dynamically promote dopamine release and enable motivation
Source: eLife journal article supplement (doi:10.7554/elife.85011), 2023-06-05

**a**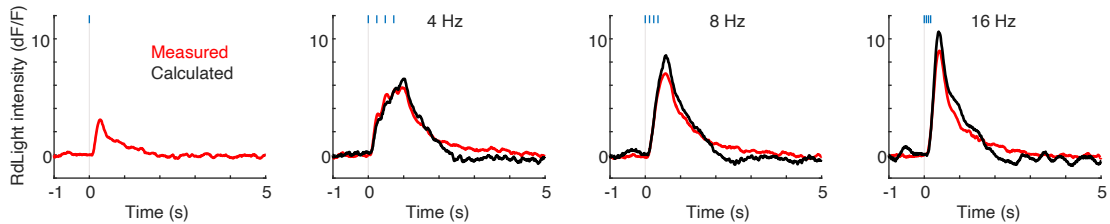**b**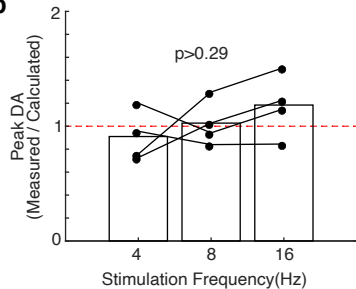

Supplement: supp [file elife-85011-supp-v1.zip]
